# Supplementary material
Source: Springer Nature journal article supplement (https://www.springermedizin.de/resource/supplementary/12911_2007_204_MOESM2_ESM.pdf/9527370)
Supplement: MOESM2 [file 9527370]

=====

## DISCHARGE SUMMARY

Name: [\*\*Known patient lastname\*\*], [\*\*Known patient firstname\*\*]

[\*\*Unit Number 626\*\*]

Admission Date: [\*\*2016-11-07\*\*]

Discharge Date: [\*\*2016-11-22\*\*]

Date of Birth: [\*\*1972-09-20\*\*]

Sex: F

**HISTORY OF PRESENT ILLNESS:** Patient is a 44-year-old lady status post living related kidney transplant on [\*\*2016-10-19\*\*], who presented at [\*\*Hospital 36\*\*] for end-stage renal disease secondary to type 1 diabetes mellitus.

She presented to [\*\*Hospital1 \*\*] on [\*\*2016-11-07\*\*] with increased drainage from her surgical wound and JP, increased abdominal pain, and anuria x4 days. The patient reported constipation for a week. She denies flatus. She was complaining of nausea and vomiting. Her abdominal pain had become progressively worse left lower quadrant most notable. There is no radiation to the back or elsewhere. She denied any fevers, chills. She noted decreased p.o. intake recently. Her drainage from her wound incision and JP was notable for yellowish clear urine smelling fluid.

=====
